# Supplementary material
Source: Research Square preprint supplement (doi:10.21203/rs.3.rs-8834497/v1)
Supplement: Supplementary file 1 [file c6cc1c9171f4b15e47920fb4.docx]

**Figure S1.** **The flow chart of this study.** This retrospective cohort study ultimately included 11,895 pregnant women who received first‑trimester prenatal screening (< 14 weeks), among whom 485 were diagnosed with preeclampsia (PE) according to the American College of Obstetricians and Gynecologists (ACOG) criteria. Early‑pregnancy fasting blood samples were used to measure the monocyte‑to‑high‑density lipoprotein cholesterol ratio (MHR), and potential confounders—including maternal age, body mass index (BMI), parity, in vitro fertilization (IVF) conception, and multifetal gestation—were documented. The independent association between the log transformed MHR (ln[MHR]) and PE was assessed using multivariable logistic regression. Dose‑response relationships and potential threshold effects were further examined through ln(MHR) quartile trend analysis, restricted cubic spline (RCS) regression, and two‑piecewise linear regression. Subgroup analyses were performed to evaluate the consistency of the observed association across different subpopulations. Finally, the predictive performance of ln(MHR) alone and in combination with established biomarkers—specifically placental growth factor (PlGF) and mean arterial pressure (MAP)—was evaluated and compared.

**
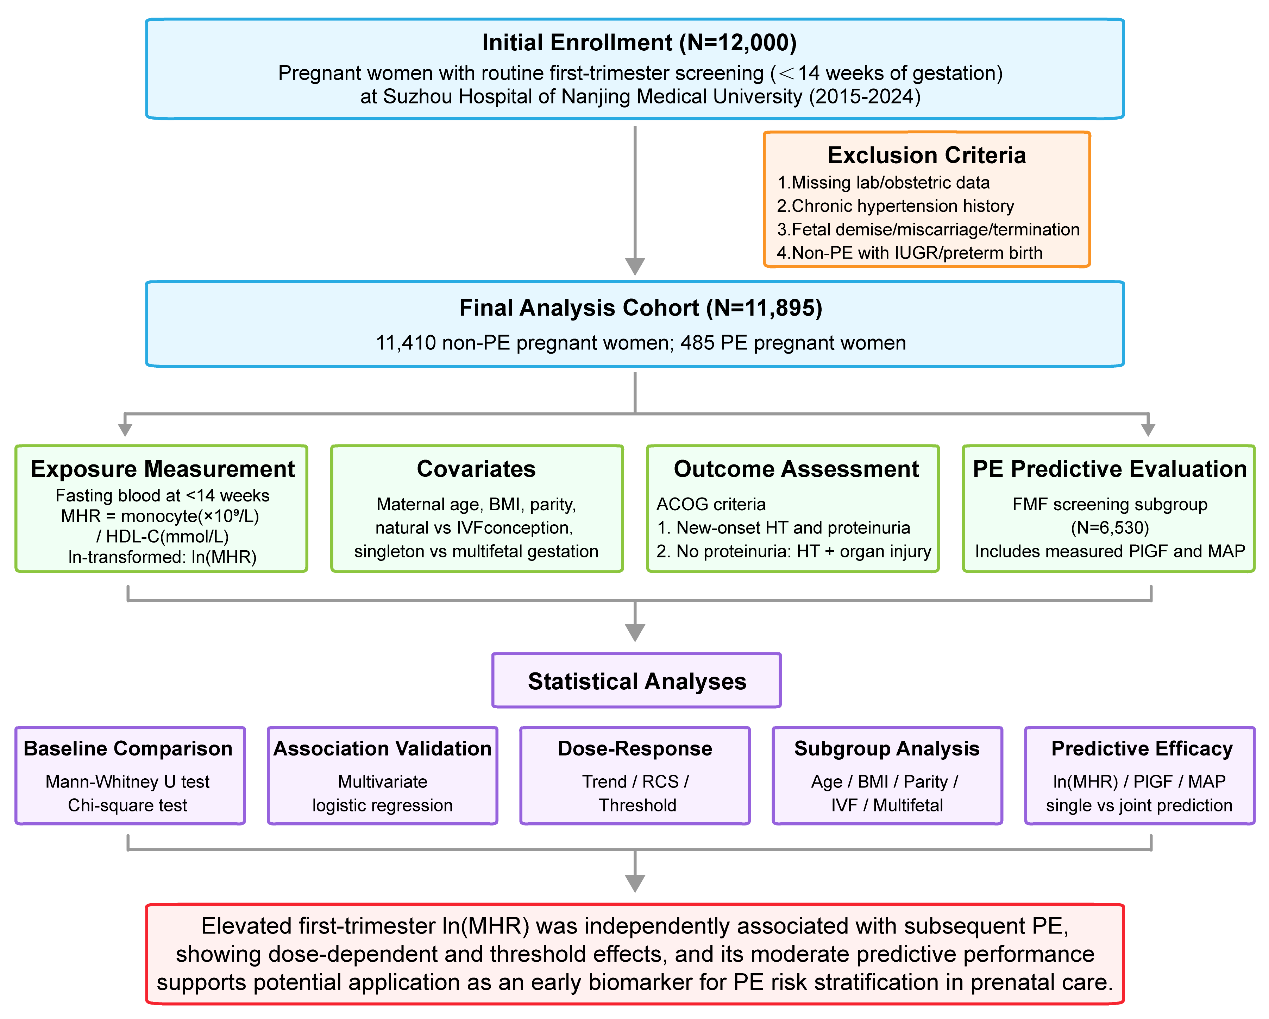
**

**Table S1. Performance of models for predicting PE**

| Chort | Model | AUC | Cut-off value | Sensitivity | Specificity | Accuracy | Positive Predictive Value | Negative Predictive Value | Youden's Index |
| --- | --- | --- | --- | --- | --- | --- | --- | --- | --- |
| Entire | ln(MHR) | 0.613 (0.577 ~ 0.649) | −1.372 | 0.489 | 0.706 | 0.697 | 0.066 | 0.970 | 0.195 |
| PlGF | 0.603 (0.568 ~ 0.639) | 0.859 | 0.664 | 0.516 | 0.522 | 0.055 | 0.973 | 0.180 |
| MAP | 0.700 (0.666 ~ 0.734) | 1.079 | 0.567 | 0.756 | 0.748 | 0.090 | 0.976 | 0.323 |
| ln(MHR)-PlGF | 0.643 (0.608 ~ 0.677) | −3.192 | 0.634 | 0.574 | 0.577 | 0.060 | 0.973 | 0.209 |
| ln(MHR)-MAP | 0.703 (0.669 ~ 0.737) | −3.323 | 0.799 | 0.515 | 0.526 | 0.066 | 0.984 | 0.313 |
| PlGF-MAP | 0.698 (0.663 ~ 0.733) | −3.003 | 0.627 | 0.694 | 0.691 | 0.080 | 0.977 | 0.320 |
| ln(MHR)-PlGF-MAP | 0.712 (0.678 ~ 0.745) | −3.085 | 0.668 | 0.661 | 0.662 | 0.078 | 0.979 | 0.329 |
| Maternal risk factors-ln(MHR)-PlGF-MAP | 0.805 (0.775 ~ 0.834) | −3.116 | 0.713 | 0.766 | 0.764 | 0.115 | 0.984 | 0.478 |
| Preterm | ln(MHR) | 0.603 (0.533 ~ 0.673) | −1.268 | 0.402 | 0.803 | 0.798 | 0.028 | 0.990 | 0.206 |
| PlGF | 0.717 (0.665 ~ 0.768) | 0.846 | 0.828 | 0.530 | 0.534 | 0.024 | 0.996 | 0.357 |
| MAP | 0.690 (0.625 ~ 0.755) | 1.048 | 0.678 | 0.655 | 0.656 | 0.027 | 0.993 | 0.334 |
| ln(MHR)-PlGF | 0.730 (0.673 ~ 0.786) | −3.874 | 0.540 | 0.814 | 0.810 | 0.039 | 0.992 | 0.354 |
| ln(MHR)-MAP | 0.616 (0.545 ~ 0.686) | −4.118 | 0.517 | 0.715 | 0.713 | 0.025 | 0.991 | 0.233 |
| PlGF-MAP | 0.742 (0.691 ~ 0.793) | −4.190 | 0.724 | 0.672 | 0.672 | 0.030 | 0.994 | 0.396 |
| ln(MHR)-PlGF-MAP | 0.758 (0.706 ~ 0.810) | −4.362 | 0.747 | 0.651 | 0.652 | 0.029 | 0.995 | 0.398 |
| Maternal risk factors-ln(MHR)-PlGF-MAP | 0.824 (0.779 ~ 0.870) | −3.941 | 0.713 | 0.826 | 0.824 | 0.054 | 0.995 | 0.538 |
| Term | ln(MHR) | 0.618 (0.577 ~ 0.658) | −1.375 | 0.497 | 0.702 | 0.697 | 0.046 | 0.980 | 0.200 |
| PlGF | 0.549 (0.506 ~ 0.592) | 0.859 | 0.586 | 0.516 | 0.518 | 0.034 | 0.977 | 0.102 |
| MAP | 0.705 (0.666 ~ 0.744) | 1.065 | 0.608 | 0.713 | 0.710 | 0.058 | 0.984 | 0.321 |
| ln(MHR)-PlGF | 0.625 (0.584 ~ 0.666) | −3.653 | 0.713 | 0.488 | 0.494 | 0.039 | 0.983 | 0.201 |
| ln(MHR)-MAP | 0.727 (0.689 ~ 0.764) | −3.545 | 0.713 | 0.638 | 0.640 | 0.054 | 0.987 | 0.351 |
| PlGF-MAP | 0.705 (0.667 ~ 0.744) | −3.486 | 0.674 | 0.654 | 0.655 | 0.053 | 0.986 | 0.328 |
| ln(MHR)-PlGF-MAP | 0.729 (0.692 ~ 0.766) | −3.653 | 0.779 | 0.585 | 0.590 | 0.051 | 0.989 | 0.364 |
| Maternal risk factors-ln(MHR)-PlGF-MAP | 0.809 (0.775 ~ 0.842) | −3.527 | 0.768 | 0.745 | 0.746 | 0.080 | 0.991 | 0.513 |
